# Supplementary material for: Multi-template synthesis of hierarchically porous carbon spheres with potential application in supercapacitors
Source: Royal Society of Chemistry journal article supplement (doi:10.1039/c6ra24524b), 2016-01-01
Supplement: c6ra24524b1.pdf [file c6ra24524b1.pdf]

Supporting Information

**Multi-template synthesis of hierarchical porous carbon spheres  
with potential application in supercapacitors**

Weizheng Zhou,<sup>†</sup> Zhixing Lin,<sup>†</sup> Gangsheng Tong,<sup>\*‡</sup> Simeon D. Stoyanov,<sup>§</sup> Deyue Yan,<sup>†</sup>  
Yiyong Mai<sup>\*†</sup> and Xinyuan Zhu<sup>\*†</sup>

<sup>†</sup>School of Chemistry and Chemical Engineering, Shanghai Key Lab of Electrical Insulation and Thermal Aging, Shanghai Jiao Tong University, Shanghai, 200240, P. R. China. E-mail: xyzhu@sjtu.edu.cn; mai@sjtu.edu.cn

<sup>‡</sup>Instrumental Analysis Center, Shanghai Jiao Tong University, Shanghai 200240, P. R. China. E-mail: tgs@sjtu.edu.cn

<sup>§</sup>Physical Chemistry and Soft Matter, Wageningen University, Wageningen, The Netherlands; Department of Mechanical Engineering, University College London, Torrington Place, London WC1E 7JE, UK. E-mail: Simeon.stoyanov@wur.nl

# Table of Contents

## Figures

**Fig. S1** SEM images of pristine  $\text{CaCO}_3$  rods.

**Fig. S2** Optical micrographs of  $\text{CaCO}_3$ -rod stabilised w/o emulsions and  $\text{CaCO}_3$ /silica composite capsules prepared with different APTES contents.

**Fig. S3** Optical micrographs of silica capsules prepared with different APTES contents.

**Fig. S4** Small angle X-ray diffraction (XRD) patterns of silica capsules prepared with different APTES contents.

**Fig. S5** Influence of no addition of polyvinyl pyrrolidone (PVP): Deionized water was used to replace 2.5 wt% PVP aqueous solution as the inner phase of  $\text{CaCO}_3$ -rod stabilised w/o emulsions. Optical micrographs of  $\text{CaCO}_3$ -rod stabilised w/o emulsions and  $\text{CaCO}_3$ /silica composite capsules prepared with different APTES contents.

**Fig. S6** Influence of no addition of polyvinyl pyrrolidone (PVP): Deionized water was used to replace 2.5 wt% PVP aqueous solution as the inner phase of  $\text{CaCO}_3$ -rod stabilised w/o emulsions. Optical micrographs of silica capsules prepared with different APTES contents.

**Fig. S7** Influence of no addition of polyvinyl pyrrolidone (PVP): Deionized water was used to replace 2.5 wt% PVP aqueous solution as the inner phase of  $\text{CaCO}_3$ -rod stabilised w/o emulsions. Microstructure evolution of hierarchical silica capsules with the increase of APTES content in the oil phase, observed by Cryo-SEM.

**Fig. S8** SEM images of hierarchical porous carbon (HPC) spheres.

**Fig. S9** Small angle XRD patterns of hierarchical porous carbon (HPC) spheres.

**Fig. S10** Digital photos of ordered mesoporous polymer composites (OMPC).

**Fig. S11** CV curves of HPC2 at different scan rates.

## Tables

**Table S1** BET surface area ( $S_{bet}$ ), Micropore area ( $S_m$ ) and External surface area ( $S_e$ ) of Silica capsules prepared from the systems with different APTES contents

**Table S2** BET surface area ( $S_{bet}$ ) and Total pore volume ( $V_t$ ) of hierarchical porous carbons (HPCs) prepared from hierarchical silica based on the systems with different APTES contents

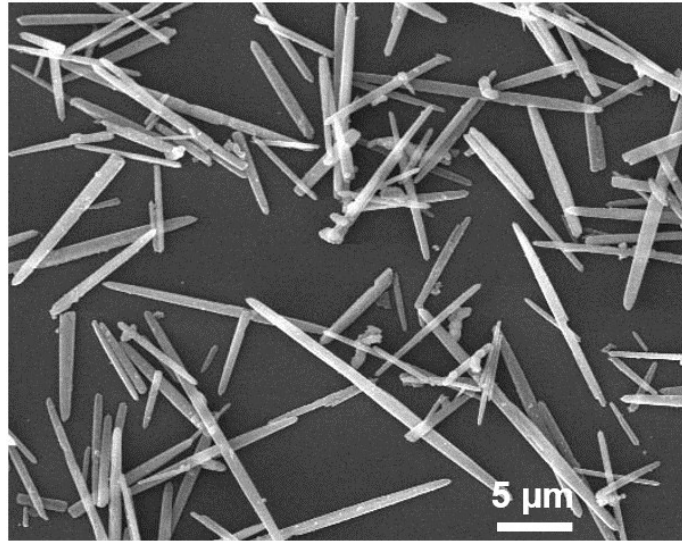

**Fig. S1** SEM images of pristine CaCO<sub>3</sub> rods.

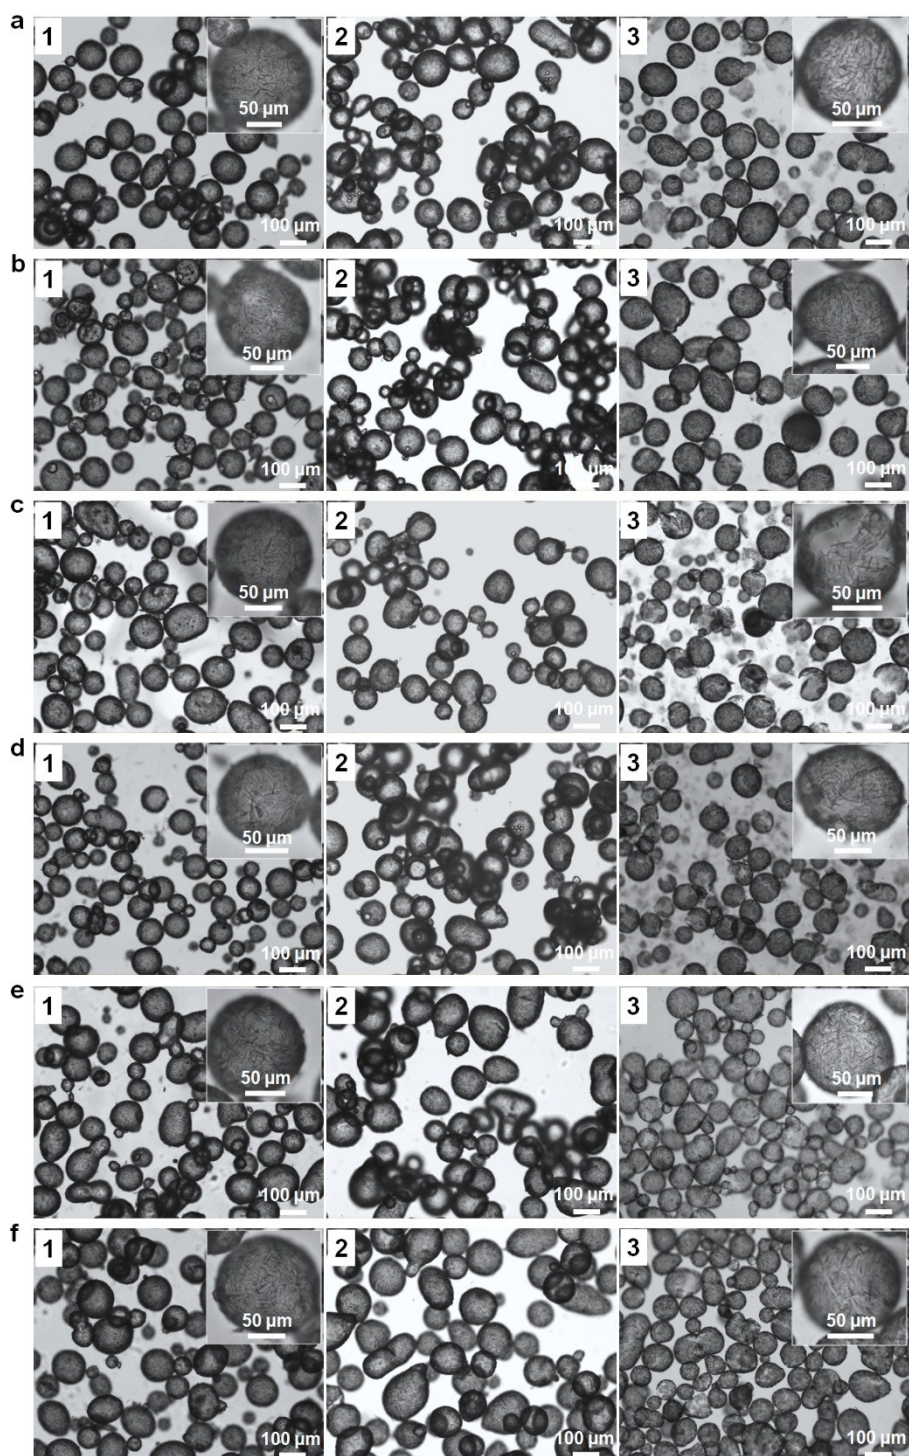

**Fig. S2** Optical micrographs of  $\text{CaCO}_3$ -rod stabilised w/o emulsions and  $\text{CaCO}_3$ /silica composite capsules prepared with different APTES contents. a) 0.04 mL APTES,  $\text{CaCO}_3$ -rod stabilised emulsions (a1), the emulsion aged at 60 °C for 20 h (a2), and  $\text{CaCO}_3$ /silica composite capsules (a3). b) 0.10 mL APTES. c) 0.20 mL APTES. d) 0.40 mL APTES. e) 0.80 mL APTES. f) 1.20 mL APTES. The inset graph of each shows a single emulsion droplet or capsule.

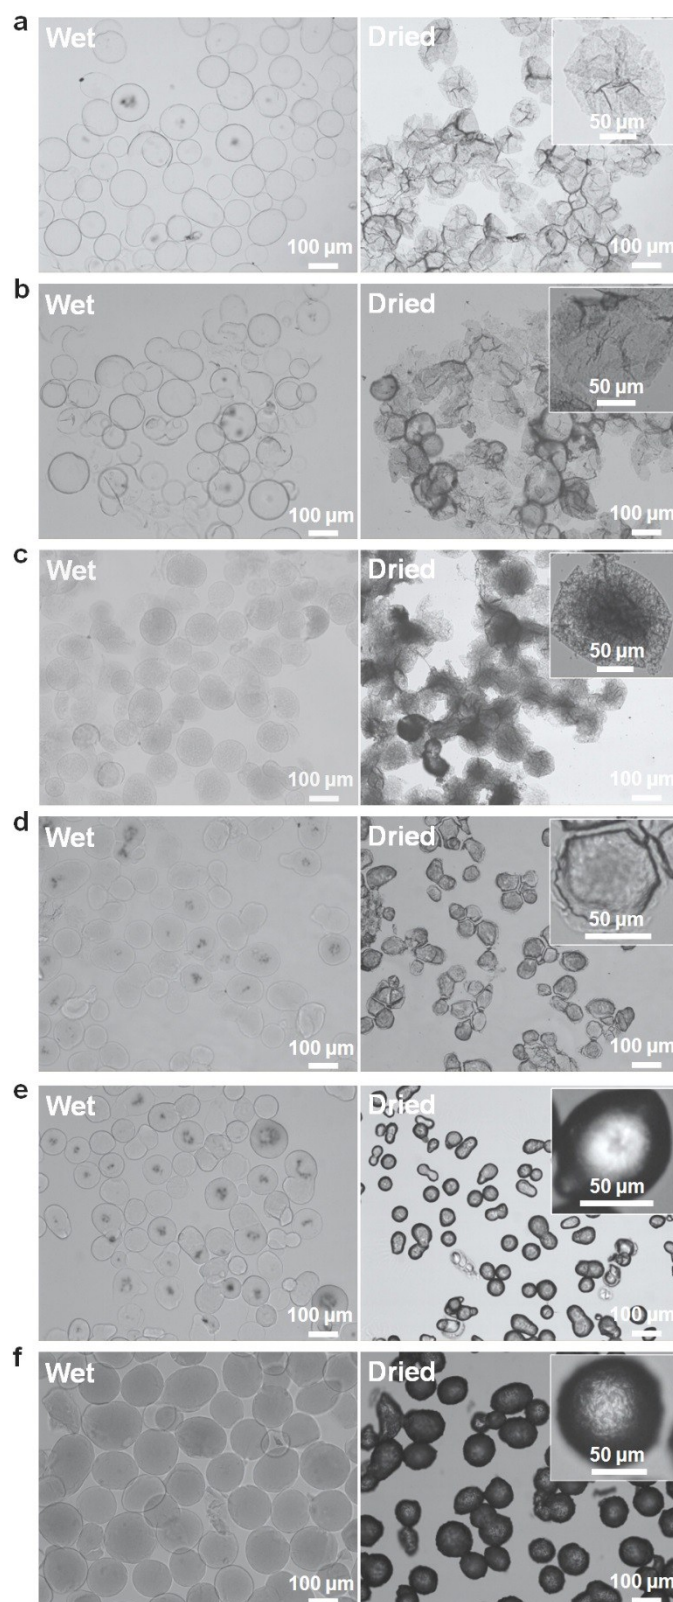

**Fig. S3** Optical micrographs of silica capsules prepared with different APTES contents. a) 0.04 mL APTES, wet and dried silica capsules. b) 0.10 mL APTES. c) 0.20 mL APTES. d) 0.40 mL APTES. e) 0.80 mL APTES. f) 1.20 mL APTES. The inset graph of each shows a single silica capsule.



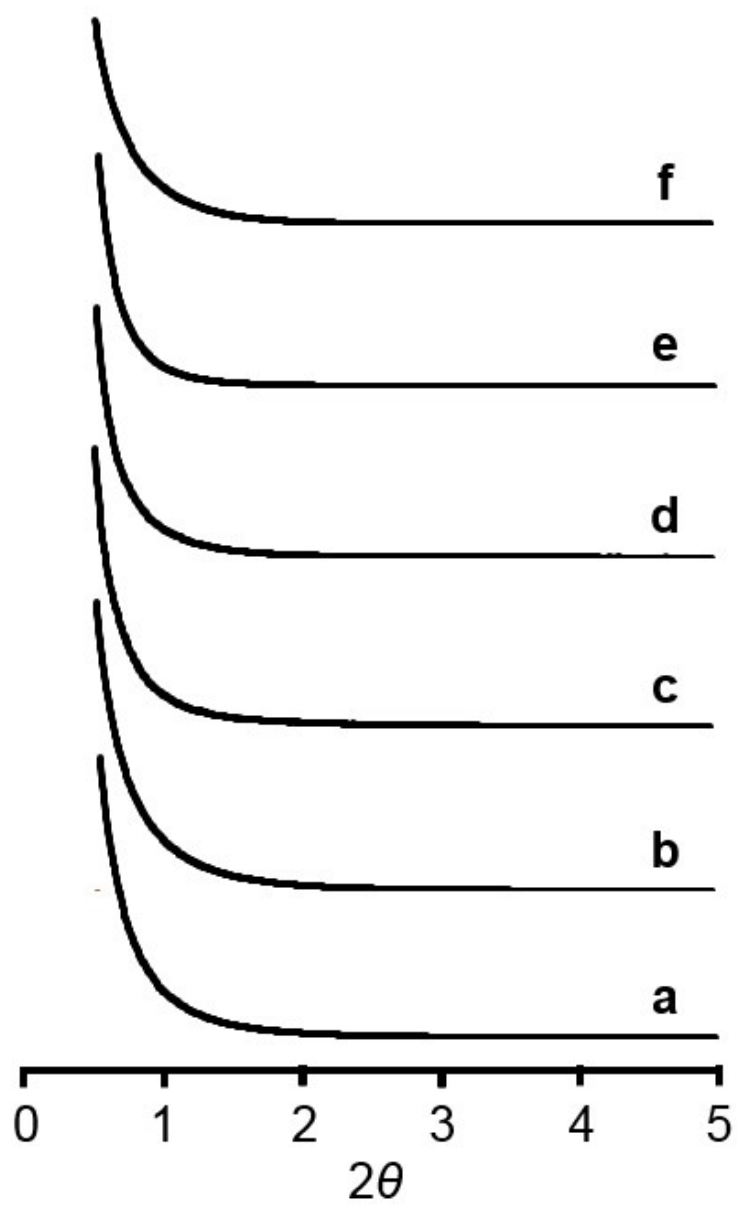

**Fig. S4** Small angle X-ray diffraction (XRD) patterns of silica capsules prepared with different APTES contents. a) 0.04 mL APTES. b) 0.10 mL APTES. c) 0.20 mL APTES. d) 0.40 mL APTES. e) 0.80 mL APTES. f) 1.20 mL APTES.

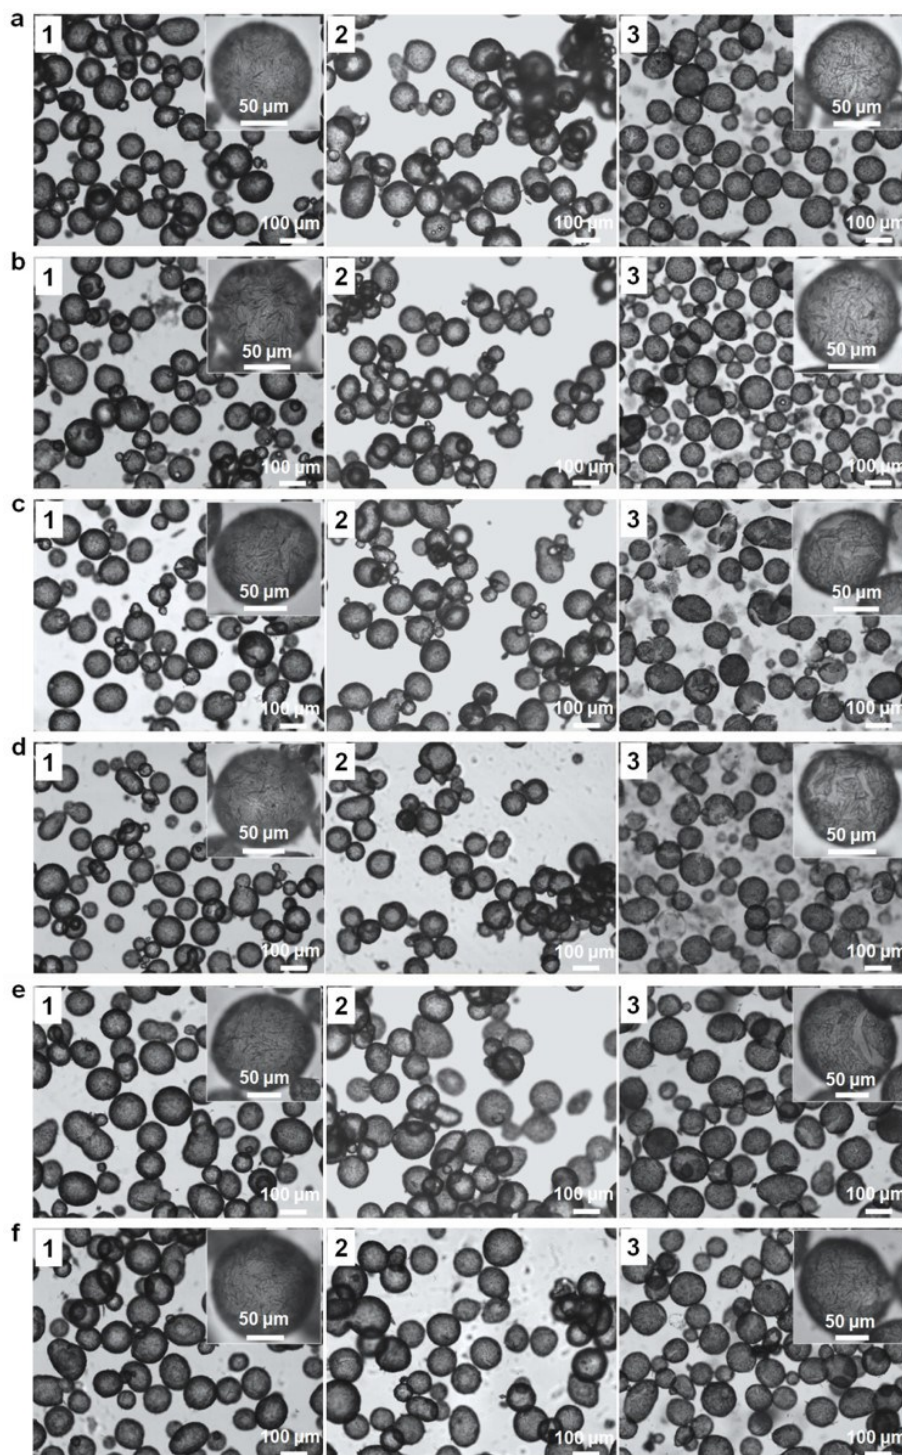

**Fig. S5** Influence of no addition of polyvinyl pyrrolidone (PVP): Deionized water was used to replace 2.5 wt% PVP aqueous solution as the inner phase of  $\text{CaCO}_3$ -rod stabilised w/o emulsions. Optical micrographs of  $\text{CaCO}_3$ -rod stabilised w/o emulsions and  $\text{CaCO}_3$ /silica composite capsules prepared with different APTES contents. a) 0.04 mL APTES,  $\text{CaCO}_3$ -rod stabilised emulsions (a1), the emulsion aged at 60 °C for 20 h (a2), and  $\text{CaCO}_3$ /silica composite capsules (a3). b) 0.10 mL APTES. c) 0.20 mL APTES. d) 0.40 mL APTES. e) 0.80 mL APTES. f) 1.20 mL APTES. The inset graph of each shows a single emulsion droplet or capsule.

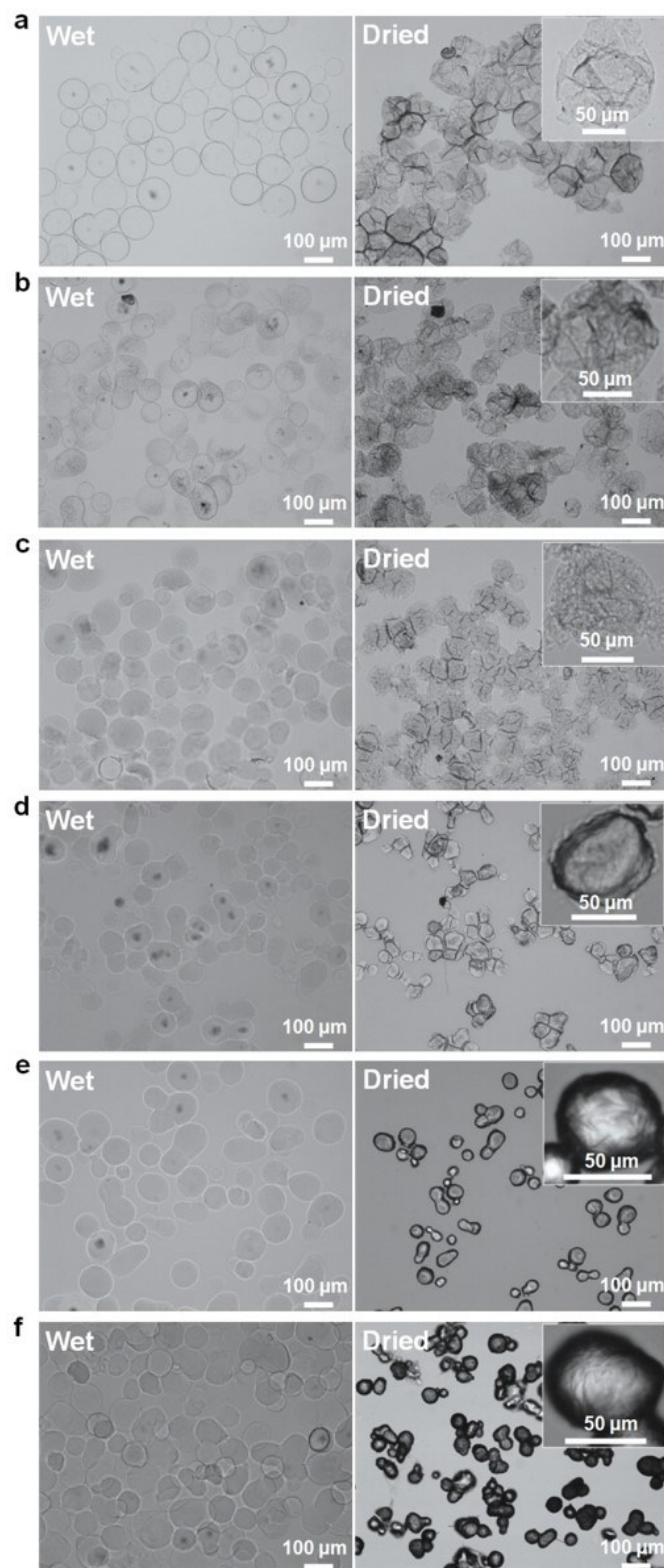

**Fig. S6** Influence of no addition of polyvinyl pyrrolidone (PVP): Deionized water was used to replace 2.5 wt% PVP aqueous solution as the inner phase of  $\text{CaCO}_3$ -rod stabilised w/o emulsions. Optical micrographs of silica capsules prepared with different APTES contents. a) 0.04 mL APTES, wet and dried silica capsules. b) 0.10 mL APTES. c) 0.20 mL APTES. d) 0.40 mL APTES. e) 0.80 mL APTES. f) 1.20 mL APTES. The inset graph of each shows a single silica capsule.



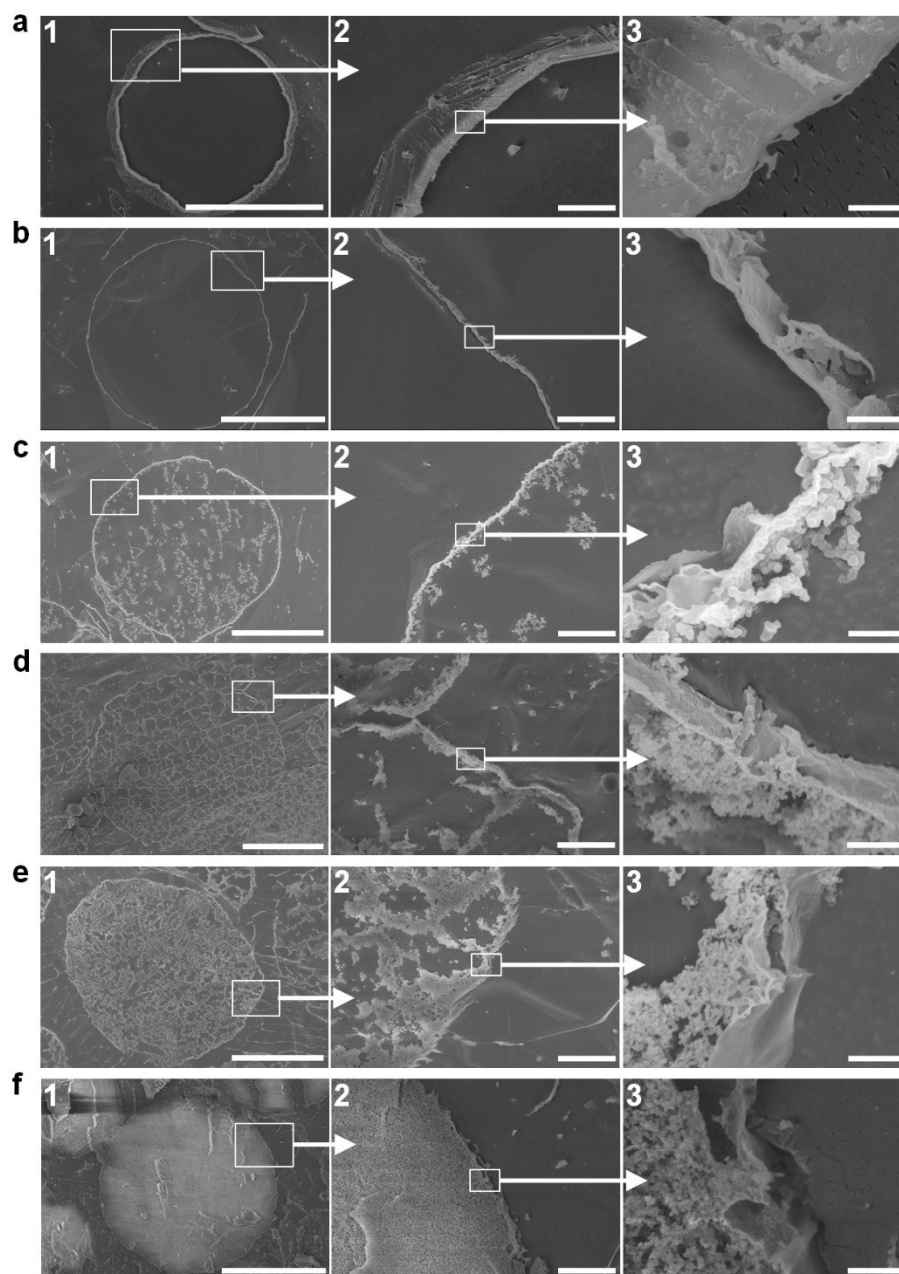

**Fig. S7** Influence of no addition of polyvinyl pyrrolidone (PVP): Deionized water was used to replace 2.5 wt% PVP aqueous solution as the inner phase of  $\text{CaCO}_3$ -rod stabilised w/o emulsions. Microstructure evolution of hierarchical silica capsules with the increase of APTES content in the oil phase, observed by Cryo-SEM. a) 0.04 mL APTES. b) 0.10 mL APTES. c) 0.20 mL APTES. d) 0.40 mL APTES. e) 0.80 mL APTES. f) 1.20 mL APTES. Scale bars, 50  $\mu\text{m}$  for a1, b1, c1, d1, e1 and f1; 5  $\mu\text{m}$  for a2, b2, c2, d2, e2 and f2; 0.5  $\mu\text{m}$  for a3, b3, c3, d3, e3 and f3.

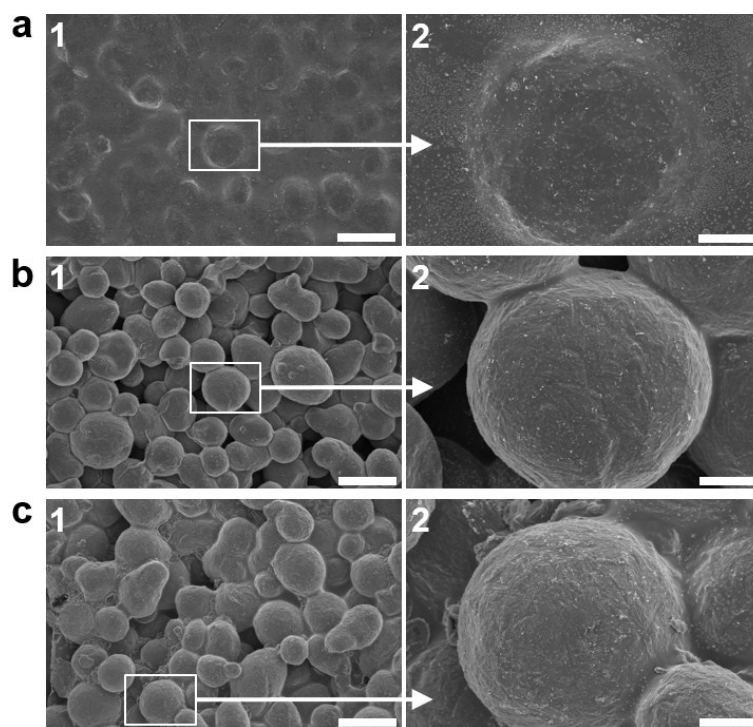

**Fig. S8** SEM images of hierarchical porous carbon (HPC) spheres. a) HPC1 prepared from the hierarchical silica based on the system with 0.40 mL APTES. b) HPC2 prepared from the hierarchical silica based on the system with 0.80 mL APTES. c) HPC3 prepared from the hierarchical silica based on the system with 1.20 mL APTES. Scale bars, 100  $\mu\text{m}$  for a1, b1 and c1; 20  $\mu\text{m}$  for a2, b2 and c2.

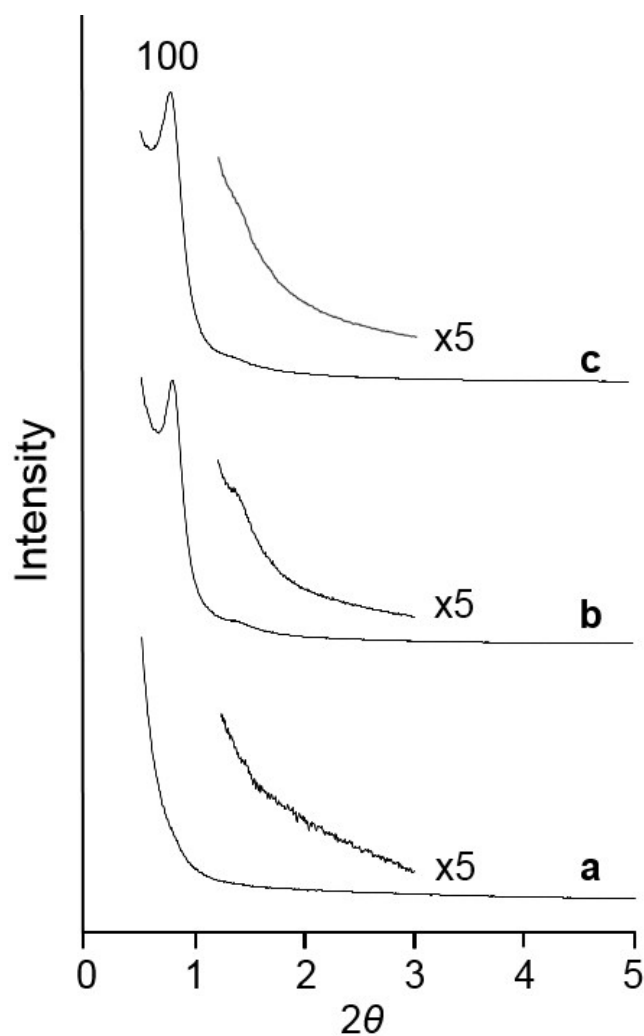

**Fig. S9** Small angle XRD patterns of hierarchical porous carbon (HPC) spheres. a) HPC1 prepared from the hierarchical silica based on the system with 0.40 mL APTES. b) HPC2 prepared from the hierarchical silica based on the system with 0.80 mL APTES. c) HPC3 prepared from the hierarchical silica based on the system with 1.20 mL APTES.

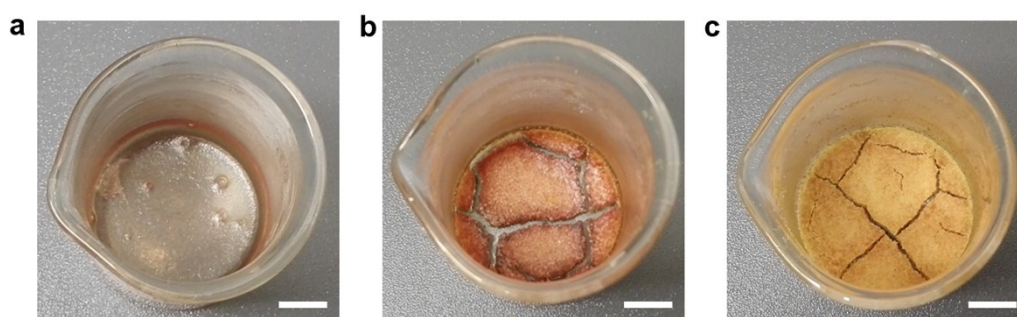

**Fig. S10** Digital photos of ordered mesoporous polymer composites (OMPC). a) OMPC1 prepared from the original system with 0.40 mL APTES. b) OMPC2 prepared from the original system with 0.80 mL APTES. c) OMPC3 prepared from the original system with 1.20 mL APTES. Scale bars, 1.0 cm for a, b and c.

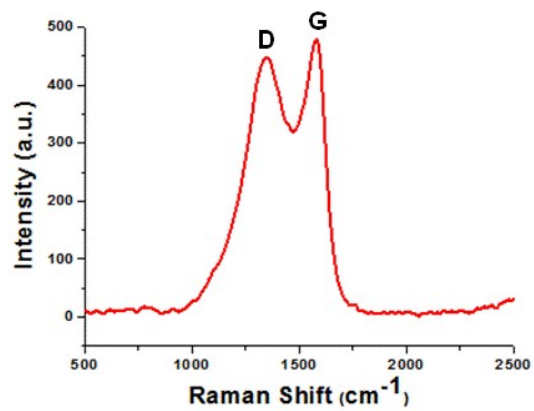

Fig. S11 A typical Raman spectrum of HPCs (using that of HPC2 as an example).

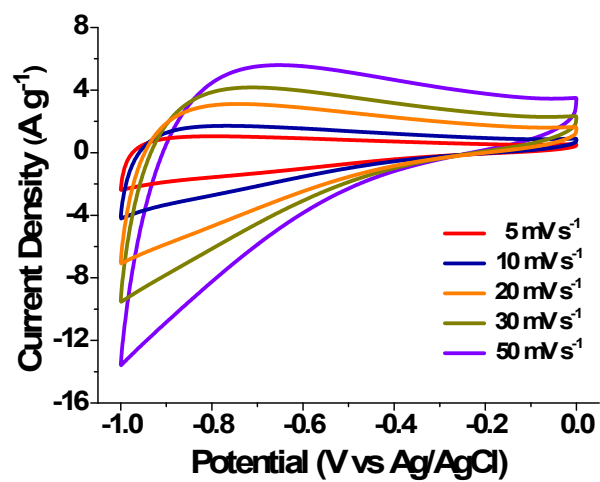

Fig. S12 CV curves of HPC2 at different scan rates.



## Tables

**Table S1** BET surface area ( $S_{bet}$ ), Micropore area ( $S_m$ ) and External surface area ( $S_e$ ) of Silica capsules prepared from the systems with different APTES contents

|                                 | $S_{bet}$<br>[m <sup>2</sup> g <sup>-1</sup> ] | $S_m$<br>[m <sup>2</sup> g <sup>-1</sup> ] | $S_e$<br>[m <sup>2</sup> g <sup>-1</sup> ] |
|---------------------------------|------------------------------------------------|--------------------------------------------|--------------------------------------------|
| Silica capsule 1, 0.04 mL APTES | <b>287</b>                                     | <b>67</b>                                  | <b>220</b>                                 |
| Silica capsule 2, 0.10 mL APTES | <b>250</b>                                     | <b>55</b>                                  | <b>195</b>                                 |
| Silica capsule 3, 0.20 mL APTES | <b>129</b>                                     | <b>61</b>                                  | <b>68</b>                                  |
| Silica capsule 4, 0.40 mL APTES | <b>162</b>                                     | <b>42</b>                                  | <b>120</b>                                 |
| Silica capsule 5, 0.80 mL APTES | <b>206</b>                                     | <b>0</b>                                   | <b>206</b>                                 |
| Silica capsule 6, 1.20 mL APTES | <b>422</b>                                     | <b>0</b>                                   | <b>422</b>                                 |

**Table S2** BET surface area ( $S_{bet}$ ) and Total pore volume ( $V_t$ ) of hierarchical porous carbons (HPCs) prepared from hierarchical silica based on the systems with different APTES contents

|                     | $S_{bet}$<br>[m <sup>2</sup> g <sup>-1</sup> ] <sup>[a]</sup> | $V_t$<br>[m <sup>3</sup> g <sup>-1</sup> ] <sup>[b]</sup> |
|---------------------|---------------------------------------------------------------|-----------------------------------------------------------|
| HPC1, 0.40 mL APTES | 408                                                           | 0.28                                                      |
| HPC2, 0.80 mL APTES | 628                                                           | 0.46                                                      |
| HPC3, 1.20 mL APTES | 759                                                           | 0.56                                                      |
